# Supplementary material for: Exploiting consecutive photoinduced electron transfer (ConPET) in CO2 photoreduction
Source: Royal Society of Chemistry journal article supplement (doi:10.1039/d2cc02356c), 2022-01-01
Supplement: d2cc02356c1.pdf [file d2cc02356c1.pdf]

## Supporting Information

### **Exploiting consecutive photoinduced electron transfer (ConPET) in CO<sub>2</sub> photoreduction**

Youting Fang, Ting Liu, Longxin Chen and Duobin Chao\*

School of Materials Science and Chemical Engineering, Ningbo University, Ningbo 315211,  
Zhejiang, China

## Experimental section

**Materials and instruments.** Chemicals and solvents are purchased from commercial suppliers and used as received. 4CzIPN<sup>[1]</sup> and [Fe(tpy)<sub>2</sub>](PF<sub>6</sub>)<sub>2</sub><sup>[2]</sup> were prepared as previously reported. EPR test was conducted with Bruker EMXnano. CV experiments were performed on CHI660E in a one-compartment cell using glassy carbon as working electrode, Ag/AgCl reference electrode, and platinum plate counter electrode at a scan rate of 0.1 V s<sup>-1</sup>. GC analysis for gas samples of CO<sub>2</sub> photoreduction was performed on Shimadzu GC-2014 (packed column TDX-01, 2 m x 3mm, FID detector with Shimadzu Methanizer MTN-1 for CO and TCD detector for H<sub>2</sub>, N<sub>2</sub> as carrier gas). HCOOH and other liquid products were determined by <sup>1</sup>H NMR. UV-vis-NIR absorption spectra were recorded with a G9 spectrophotometer. Emission spectra were recorded with Shimadzu RF-6000. GC-MS experiment for <sup>13</sup>CO<sub>2</sub> was carried out with Agilent 7890B-5977A. <sup>1</sup>H NMR spectra were obtained with Bruker AVANCE III (400MHz). Time-resolved emission decay plots were obtained with Edinburgh FLS980 spectrometer.

**General procedure for photocatalytic CO<sub>2</sub> reduction with [Ru(tpy)<sub>2</sub>]<sup>2+</sup> and 4CzIPN.** Typically, A 5 mL CH<sub>3</sub>CN/H<sub>2</sub>O (v/v, 4:1) solution containing catalyst [Ru(tpy)<sub>2</sub>]<sup>2+</sup>, photosensitizer 4CzIPN and electron donor TEA was added slowly into a glass tube and then carefully sealed with a rubber stopper. The solution was bubbled with CO<sub>2</sub> through a needle for 15 min and further completely sealed again for visible light irradiation by a LEDs setup (SMPC-LVWT, 420-650 nm, 3 W LEDs) supplied by Technical Institute of Physics and Chemistry CAS. The whole setup was kept at room temperature during photocatalysis. To analyze gaseous products, 100 μL of headspace gas was directly injected the GC instrument with a gastight syringe. Moles of products (CO and H<sub>2</sub>) were determined by corresponding calibration curves. Liquid products were analyzed by <sup>1</sup>H NMR spectra.

**Table S1.** Photocatalytic CO<sub>2</sub> reduction using [Ru(tpy)<sub>2</sub>]<sup>2+</sup> and 4CzIPN.<sup>[a]</sup>

| Entry            | Catalyst                              | Photosensitizer | Electron donor | CO (μmol) | H <sub>2</sub> (μmol) | TON <sub>CO</sub> (Sel.) |
|------------------|---------------------------------------|-----------------|----------------|-----------|-----------------------|--------------------------|
| 1                | [Ru(tpy) <sub>2</sub> ] <sup>2+</sup> | 4CzIPN          | TEA            | 12.4      | 0.45                  | 124 (96.5%)              |
| 2                | [Ru(tpy) <sub>2</sub> ] <sup>2+</sup> | -               | TEA            | 0         | 0                     | 0                        |
| 3                | -                                     | 4CzIPN          | TEA            | trace     | 0                     | N.D.                     |
| 4                | [Ru(tpy) <sub>2</sub> ] <sup>2+</sup> | 4CzIPN          | -              | 0         | 0                     | 0                        |
| 5 <sup>[b]</sup> | [Ru(tpy) <sub>2</sub> ] <sup>2+</sup> | 4CzIPN          | TEA            | 0         | 0                     | 0                        |
| 6 <sup>[c]</sup> | [Ru(tpy) <sub>2</sub> ] <sup>2+</sup> | 4CzIPN          | TEA            | 0         | 0                     | 0                        |

[a] Conditions: concentrations of [Ru(tpy)<sub>2</sub>]<sup>2+</sup>, 4CzIPN and TEA are 20 μM, 100 μM and 0.28 M, respectively. The solution is CO<sub>2</sub>-saturated CH<sub>3</sub>CN/H<sub>2</sub>O (v/v, 4:1) solution under visible light irradiation for 120 min. [b] Without light irradiation. [c] Without CO<sub>2</sub>.

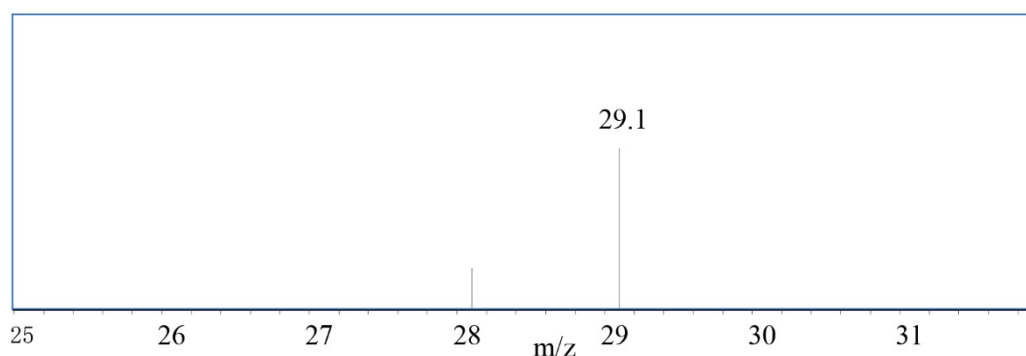**Fig. S1** Isotopic labeling experiment using <sup>13</sup>CO<sub>2</sub> to generate <sup>13</sup>CO (m/z =29.1). The gas sample was directly injected into the GC-MS instrument for analysis.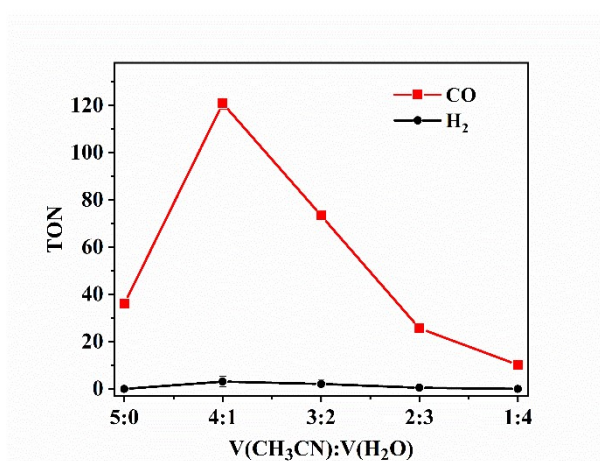**Fig. S2** Photocatalytic CO<sub>2</sub> reduction using [Ru(tpy)<sub>2</sub>]<sup>2+</sup> (20 μM), 4CzIPN (100 μM) and TEA (0.28 M) in 5mL CH<sub>3</sub>CN/H<sub>2</sub>O solution under visible light irradiation for 120 min.

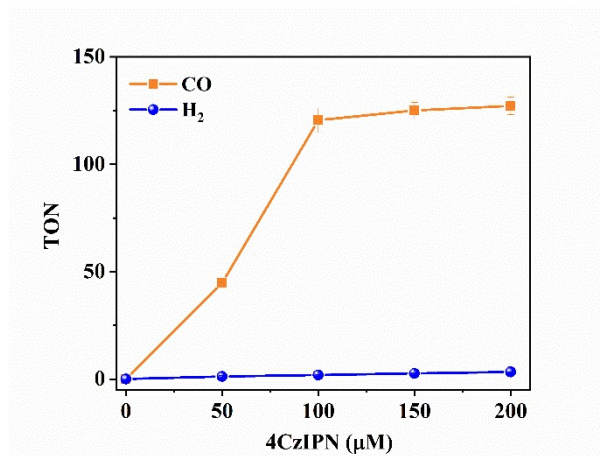

**Fig. S3** Photocatalytic CO<sub>2</sub> reduction using [Ru(tpy)<sub>2</sub>]<sup>2+</sup> (20 μM), 4CzIPN (0 - 200 μM) and TEA (0.28 M) in 5mL CH<sub>3</sub>CN/H<sub>2</sub>O (v/v, 4:1) solution under visible light irradiation for 120 min.

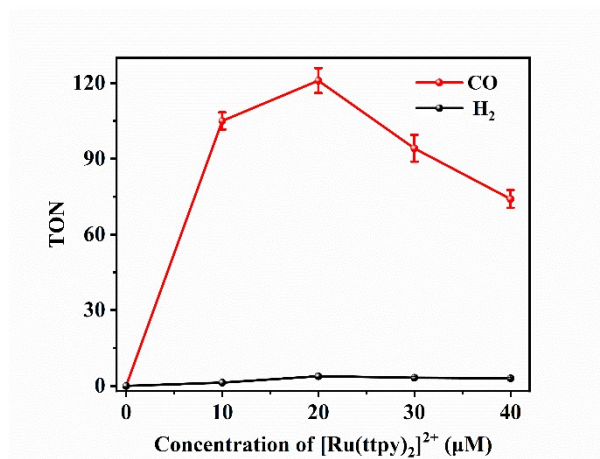

**Fig. S4** Photocatalytic CO<sub>2</sub> reduction using [Ru(tpy)<sub>2</sub>]<sup>2+</sup> (0 - 40 μM), 4CzIPN (100 μM) and TEA (0.28 M) in 5mL CH<sub>3</sub>CN/H<sub>2</sub>O (v/v, 4:1) solution under visible light irradiation for 120 min.

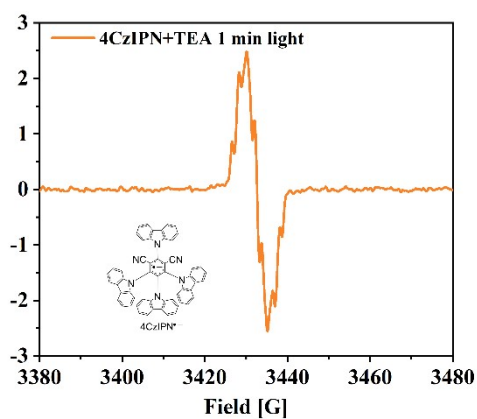

**Fig. S5** EPR spectrum of 4CzIPN (2 mM) in CH<sub>3</sub>CN/H<sub>2</sub>O (v/v, 4:1) solution containing TEA (50 mM) upon visible light irradiation.

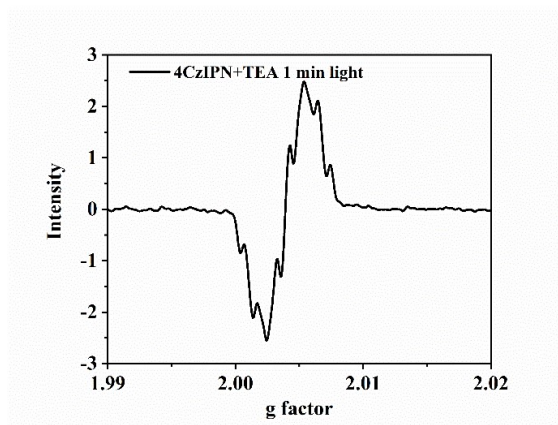

**Fig. S6** The g factor of generated radical anion  $4\text{CzIPN}^{\cdot-}$  in  $\text{CH}_3\text{CN}/\text{H}_2\text{O}$  (v/v, 4:1) solution containing 4CzIPN (2 mM) and TEA (50 mM) under a  $\text{N}_2$  atmosphere upon visible light irradiation.

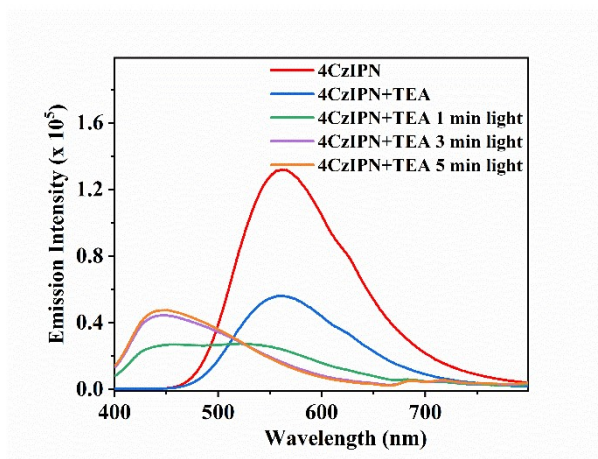

**Fig. S7** Emission spectra of 4CzIPN (50  $\mu\text{M}$ ) in  $\text{CH}_3\text{CN}/\text{H}_2\text{O}$  (v/v, 9:1) solution upon visible light irradiation under a  $\text{N}_2$  atmosphere. The concentration of TEA is 50 mM.

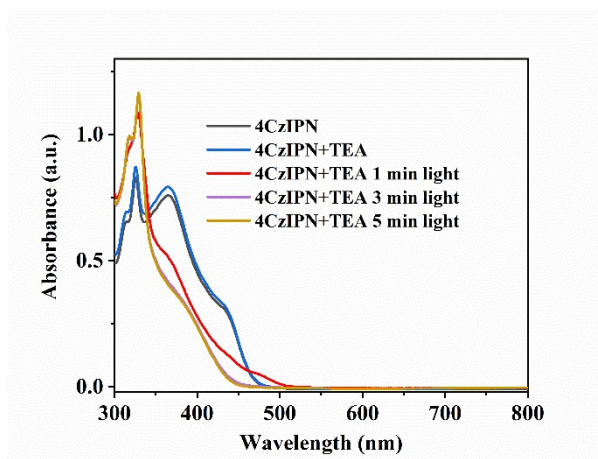

**Fig. S8** UV-vis absorption spectra of 4CzIPN (50  $\mu\text{M}$ ) in  $\text{CH}_3\text{CN}/\text{H}_2\text{O}$  (v/v, 9:1) solution upon visible light irradiation in the presence of TEA (50 mM) under a  $\text{N}_2$  atmosphere.

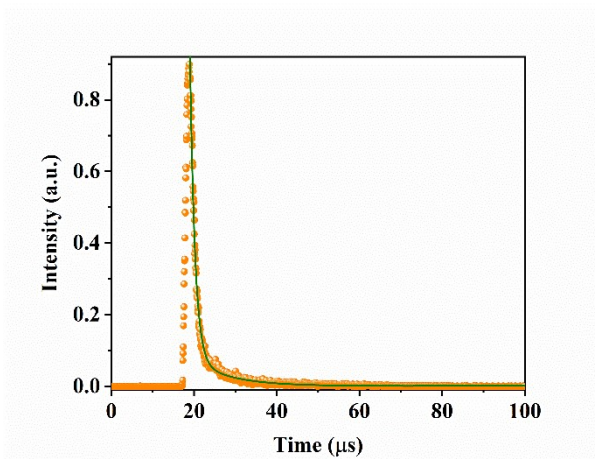

**Fig. S9** Emission decay plots at 445 nm for the solution containing 4CzIPN (50  $\mu\text{M}$ ) and TEA (50 mM) in  $\text{CH}_3\text{CN}/\text{H}_2\text{O}$  (v/v, 9:1) after 5 min of visible light irradiation under a  $\text{N}_2$  atmosphere.

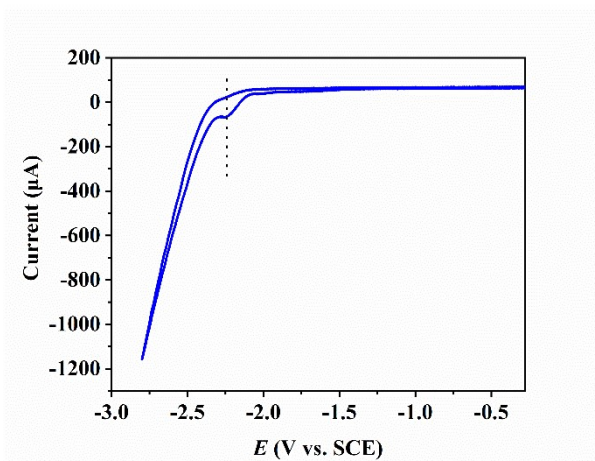

**Fig. S10** CV of 1,4-dichlorobenzene in  $\text{CH}_3\text{CN}$  solution with  $\text{NBu}_4\text{PF}_6$  (0.1 M) as supporting electrolyte at a scan rate of  $100 \text{ mV s}^{-1}$  at room temperature.

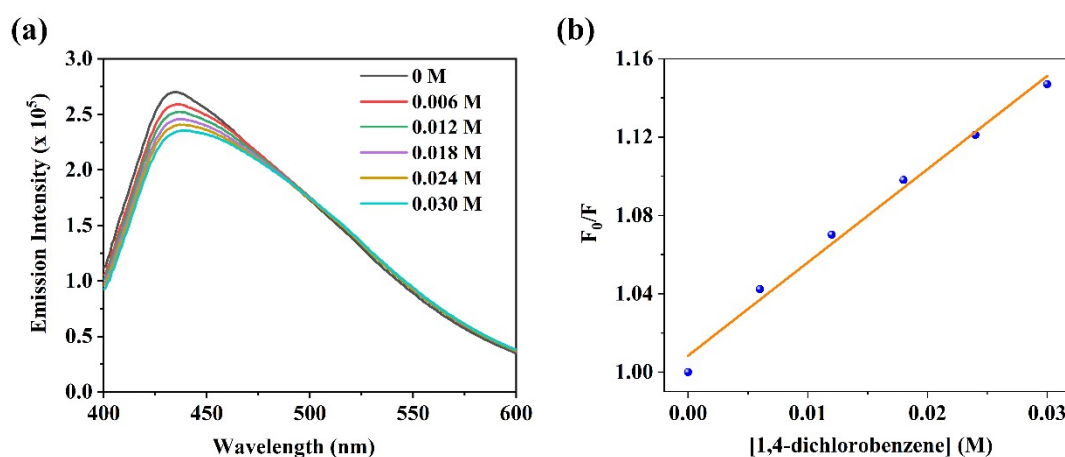

**Fig. S11** (a) Emission quenching upon addition of 1,4-dichlorobenzene (0-30 mM) under a  $\text{N}_2$  atmosphere. (b) Corresponding plots ( $F_0/F$  vs concentration of 1,4-dichlorobenzene). The Stern-Volmer quenching rate constant ( $k_q$ ) is estimated to be  $1.26 \times 10^6 \text{ M}^{-1}\text{s}^{-1}$ .  
Stern-Volmer equation

$$F_0/F = 1 + K_D[Q] = 1 + k_q\tau_0[Q]$$

where  $F_0$  and  $F$  are the emission intensity in the absence and presence of quenching agent TEA,  $\tau_0$  is the emission lifetime of radical anion  $4\text{CzIPN}^{\bullet-}$ ,  $K_q$  is the bimolecular quenching rate constant,  $K_D$  is the Stern-Volmer quenching constant, and  $[Q]$  is the molar concentration of 1,4-dichlorobenzene.

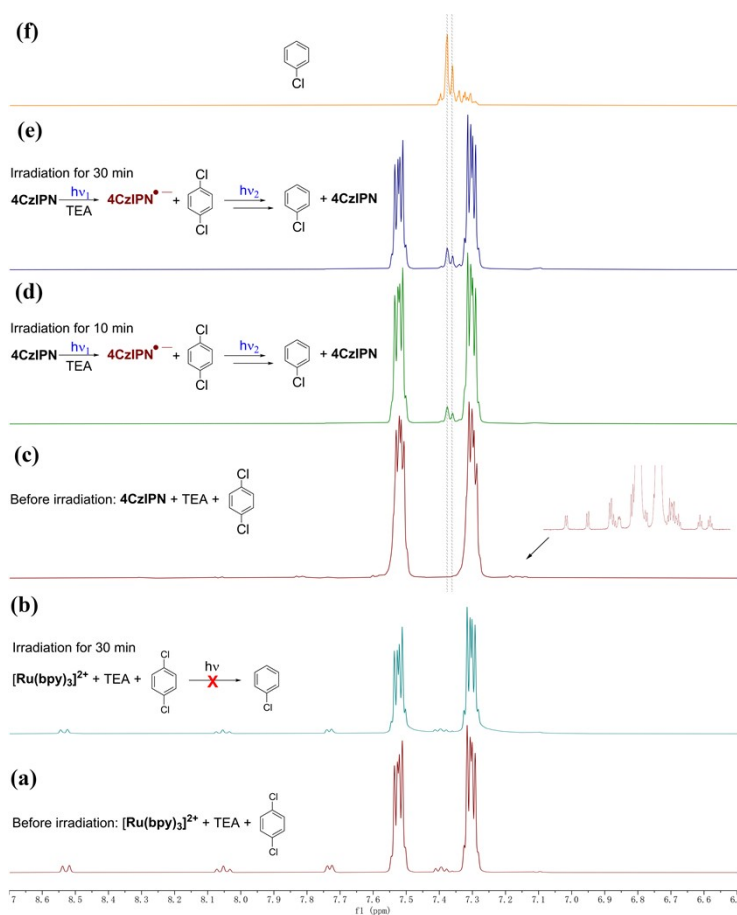

**Fig. S12**  $^1\text{H}$  NMR spectra of (a)  $\text{CD}_3\text{CN}/\text{D}_2\text{O}$  (v/v, 10:1) solution containing  $[\text{Ru}(\text{bpy})_3]^{2+}$  (0.8 mg), TEA (15.8 mg) and 1,4-dichlorobenzene (17.8 mg) before irradiation. (b) solution (a) after 30 min of irradiation. (c)  $\text{CD}_3\text{CN}/\text{D}_2\text{O}$  (v/v, 10:1) solution containing 4CzIPN (0.8 mg), TEA (15.8 mg) and 1,4-dichlorobenzene (17.8 mg) before irradiation. (d) solution (c) after 10 min of irradiation. (e) solution (c) after 30 min of irradiation. (f) chlorobenzene (10.8 mg) in  $\text{CD}_3\text{CN}/\text{D}_2\text{O}$  (v/v, 10:1) solution. The samples were prepared in a glovebox under a He atmosphere.

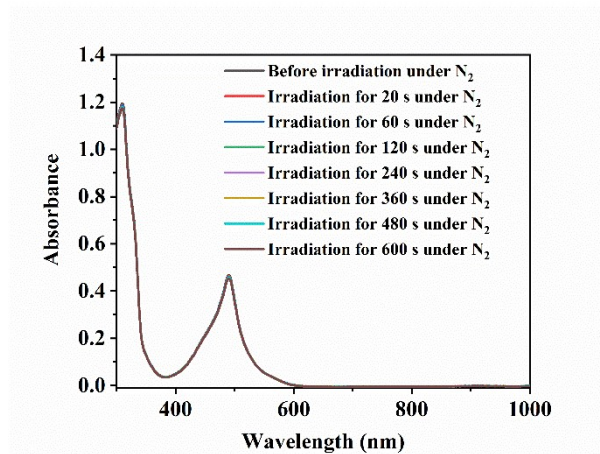

**Fig. S13** UV-vis-NIR absorption spectra of  $[\text{Ru}(\text{tpy})_2]^{2+}$  in  $\text{CH}_3\text{CN}/\text{H}_2\text{O}$  solution containing TEA upon visible light irradiation under a  $\text{N}_2$  atmosphere.

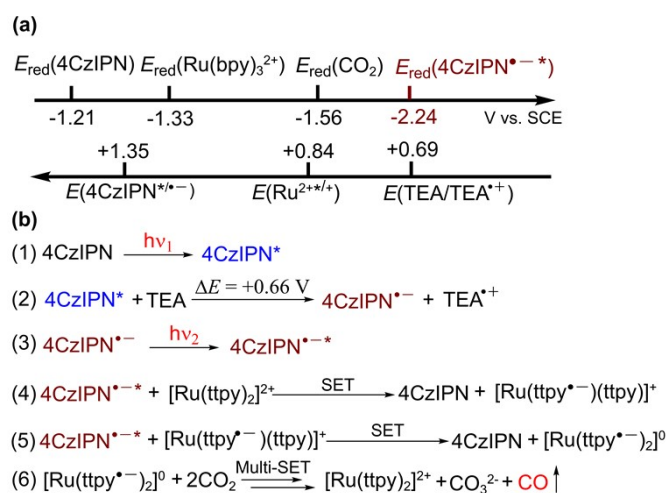

**Fig. S14** (a) Redox potentials of various species and processes in this work. (b) A probable mechanism for  $\text{CO}_2$  photoreduction using 4CzIPN and  $[\text{Ru}(\text{tpy})_2]^{2+}$ .

References:

- [1] J. Luo, J. Zhang, *ACS Catal.* **2016**, *6*, 873-877.
- [2] M. T. Indelli, F. Scandola, J.-P. Collin, J.-P. Sauvage, A. Sour, *Inorg. Chem.* **1996**, *35*, 303-312.
